# Supplementary material for: Green synthesis and characterization of Blumea sinuata silver nanoparticles: antibacterial, antifungal, and antioxidant properties
Source: Royal Society of Chemistry journal article supplement (doi:10.1039/d4na01063a), 2025-01-01
Supplement: d4na01063a1.pdf [file d4na01063a1.pdf]

## Green synthesis and characterization of *Blumea sinuata* silver nanoparticles: antibacterial, antifungal, and antioxidant properties

Umakant Pradhan, <sup>a</sup> Jagdish Prasad Prajapati, <sup>b</sup> Purusottam Majhi, <sup>a</sup> Dibyasha Sahu, <sup>b</sup> Rajesh Kumar Singh, <sup>c</sup> Sadhucharan Mallick, <sup>b</sup> and Awadhesh Kumar Shukla <sup>\*a</sup>

### Supplementary data:

**Table 1.** Antibacterial activity of BS-Ag<sub>2</sub>O NPs at different concentrations against *E. carotovora*, *R. solanacearum*, and *X. oryzae*.

| BS-Ag <sub>2</sub> O NPs concentrations | Zone of inhibition (mm) ± SD |                        |                  |
|-----------------------------------------|------------------------------|------------------------|------------------|
|                                         | <i>E. carotovora</i>         | <i>R. solanacearum</i> | <i>X. oryzae</i> |
| 200 µg/ mL                              | 16.00±0.0                    | 15.66±0.5              | 12.66±0.5        |
| 300 µg/ mL                              | 18.66±0.5                    | 17.66±0.5              | 13.33±0.5        |
| 400 µg/ mL                              | 20.66±0.5                    | 20.33±0.5              | 14.33±0.5        |
| Control                                 | 34.66±0.5                    | 34.66±0.5              | 24.66±0.5        |

**Table 2.** Antifungal activity of BS-Ag<sub>2</sub>O NPs at different concentrations against *A. alternata*, *A. flavus*, *A. niger*, and *F. oxysporum*.

| BS-Ag <sub>2</sub> O NPs concentrations | Percentage inhibition in fungal growth |                  |                 |                     |
|-----------------------------------------|----------------------------------------|------------------|-----------------|---------------------|
|                                         | <i>A. alternata</i>                    | <i>A. flavus</i> | <i>A. niger</i> | <i>F. oxysporum</i> |
| 0.5 mg/ mL                              | 79.78±1.5                              | 24.11±2.3        | 45.87±5.2       | 35.70±0.9           |
| 1.0 mg/ mL                              | 84.59±3.7                              | 42.19±2.6        | 52.46±2.5       | 42.84±2.1           |
| 1.5 mg/ mL                              | 91.70±1.7                              | 62.65±1.8        | 58.96±3.5       | 50.45±1.5           |

**Table 3.** Antioxidant activity of BS-Ag<sub>2</sub>O NPs at different concentrations and ascorbic acid solution as standard following DPPH method.

| BS-Ag <sub>2</sub> O NPs concentrations | DPPH          |                          |
|-----------------------------------------|---------------|--------------------------|
|                                         | Ascorbic acid | BS-Ag <sub>2</sub> O NPs |
| 20 µg/ mL                               | 33.64±0.29    | 22.60±1.70               |
| 40 µg/ mL                               | 54.79±0.14    | 23.11±1.31               |
| 60 µg/ mL                               | 82.45±0.29    | 24.45±0.14               |
| 80 µg/ mL                               | 93.80±0.14    | 25.85±0.36               |

**Table 4.** Antioxidant activity of BS-Ag<sub>2</sub>O NPs at different concentrations and ascorbic acid solution as standard following ABTS method.

| BS-Ag <sub>2</sub> O NPs concentrations | ABTS          |                          |
|-----------------------------------------|---------------|--------------------------|
|                                         | Ascorbic acid | BS-Ag <sub>2</sub> O NPs |
| 20 µg/ mL                               | 46.06±0.22    | 14.04±0.11               |
| 40 µg/ mL                               | 99.83±0.00    | 25.92±1.24               |
| 60 µg/ mL                               | 100.00±0.00   | 36.75±1.13               |
| 80 µg/ mL                               | 100.00±0.00   | 40.28±0.90               |
